# Supplementary material for: Boosting the primary Zn–air battery oxygen reduction performance with mesopore-dominated semi-tubular doped-carbon nanostructures
Source: Royal Society of Chemistry journal article supplement (doi:10.1039/d0ta02741c), 2020-01-01
Supplement: d0ta02741c1.pdf [file d0ta02741c1.pdf]

# Supporting Information

## **Boosting the primary Zn-air battery oxygen reduction performance with mesopore-dominated semi-tubular doped-carbon nanostructures**

Xinyi Luo<sup>a,b†</sup>, Zhaoxu Li<sup>b†</sup>, Meifang Luo<sup>c†</sup>, Chaozhong Guo<sup>a\*</sup>, Lingtao Sun<sup>a</sup>, Shijian Lan<sup>b</sup>, Ruyue Luo<sup>b</sup>, Lan Huang<sup>b</sup>, Yuan Qin<sup>a</sup>, Zhongli Luo<sup>b\*</sup>

<sup>a</sup>Chongqing Key Laboratory of Materials Surface & Interface Science, College of Materials Science and Engineering, Chongqing University of Arts and Sciences, Chongqing 402160, China.

<sup>b</sup>College of Basic Medical Science, Chongqing Medical University, 400044, Chongqing, China.

<sup>c</sup> School of Resources and Civil Engineering, Wuhan Institute of Technology, Hubei 430070, China.

†These authors equally contributed to this work.

**\*Corresponding authors.**

**E-mail:** guochaozhong1987@163.com (C.G.); zhongliluo@163.com (Z.L.)

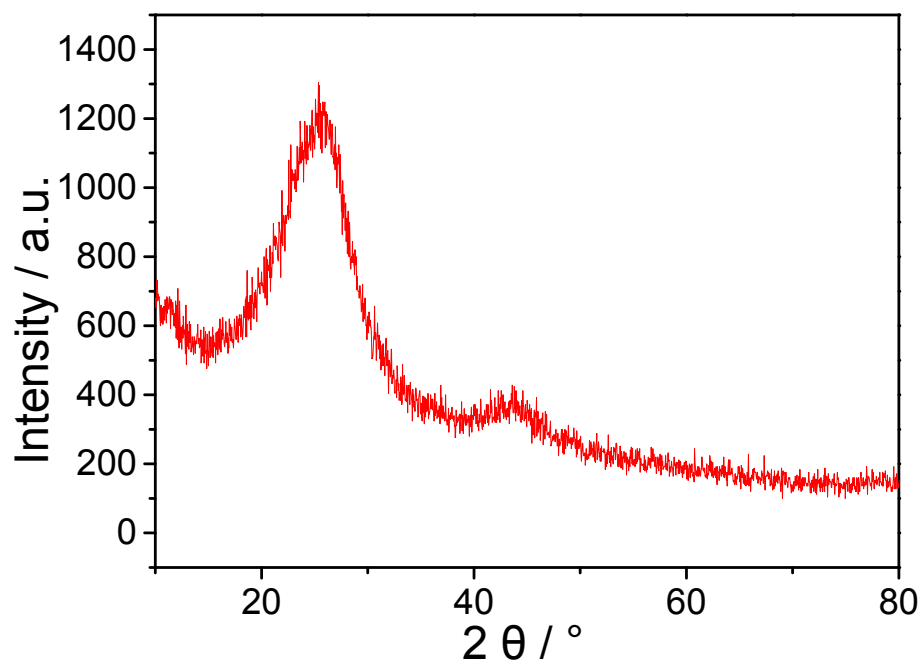

Fig. 1S. XRD image of Hemin@HN-800Zn.

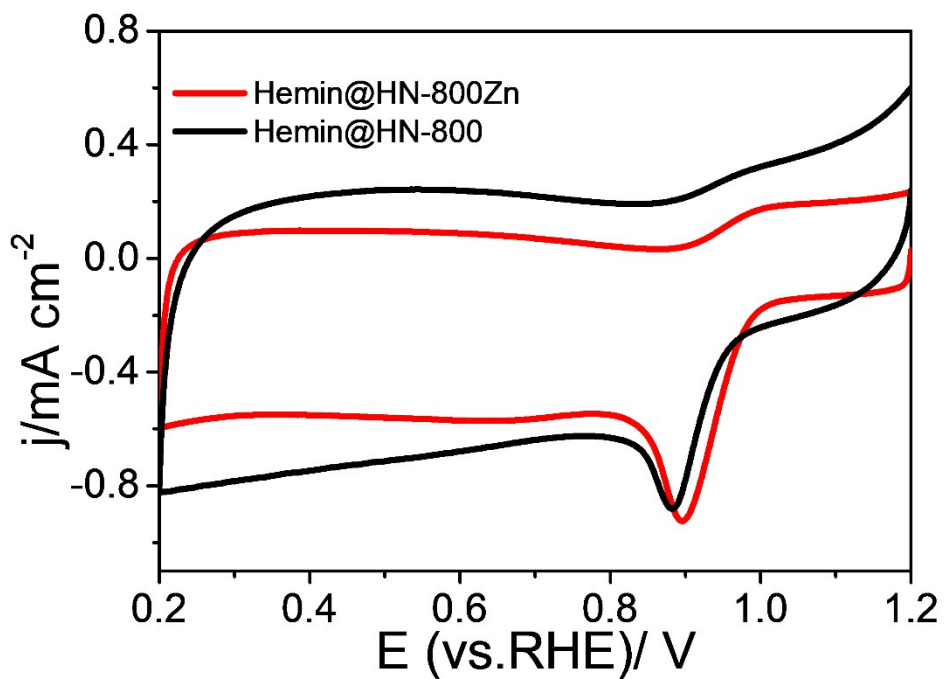

Fig. 2S. CV curves of Hemin@HN-800 and Hemin@HN-800Zn.

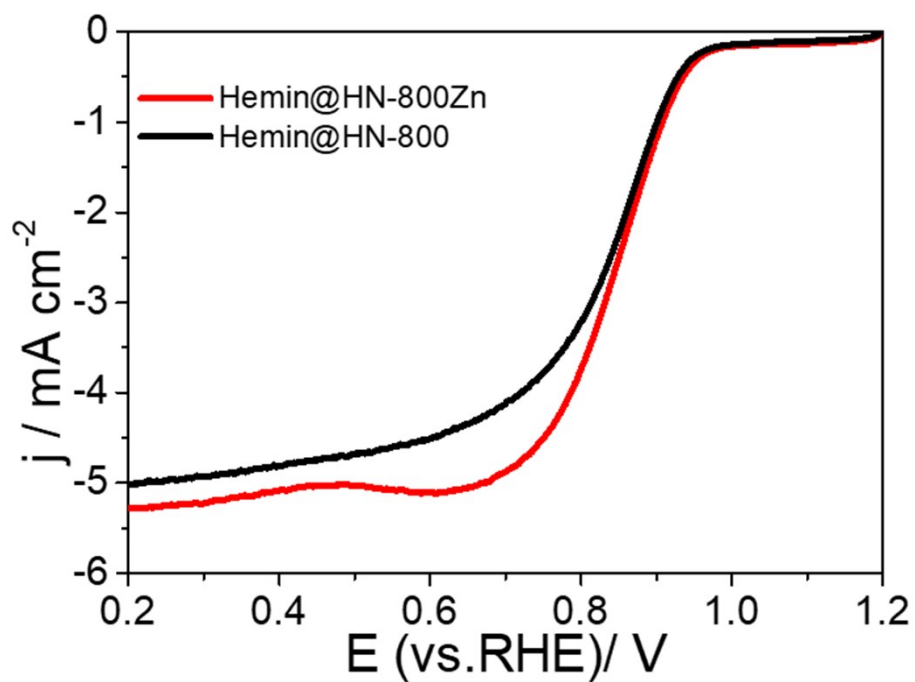

Fig. 3S. LSV curves of Hemin@HN-800 and Hemin@HN-800Zn.

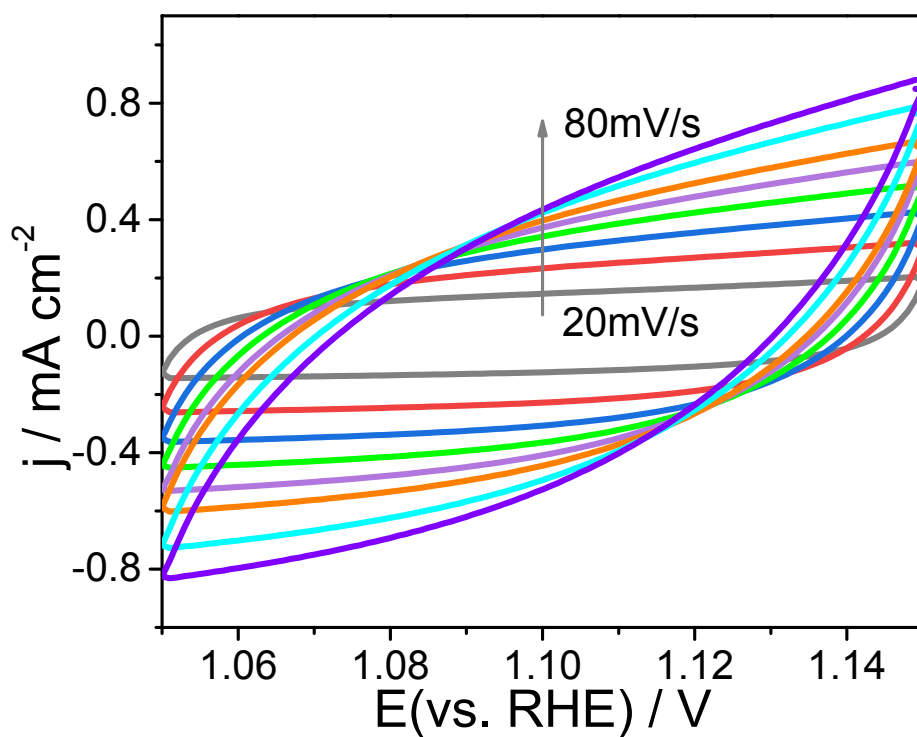

Fig. 4S. CV curves of Hemin@HN-700Zn tested at different scan rates.

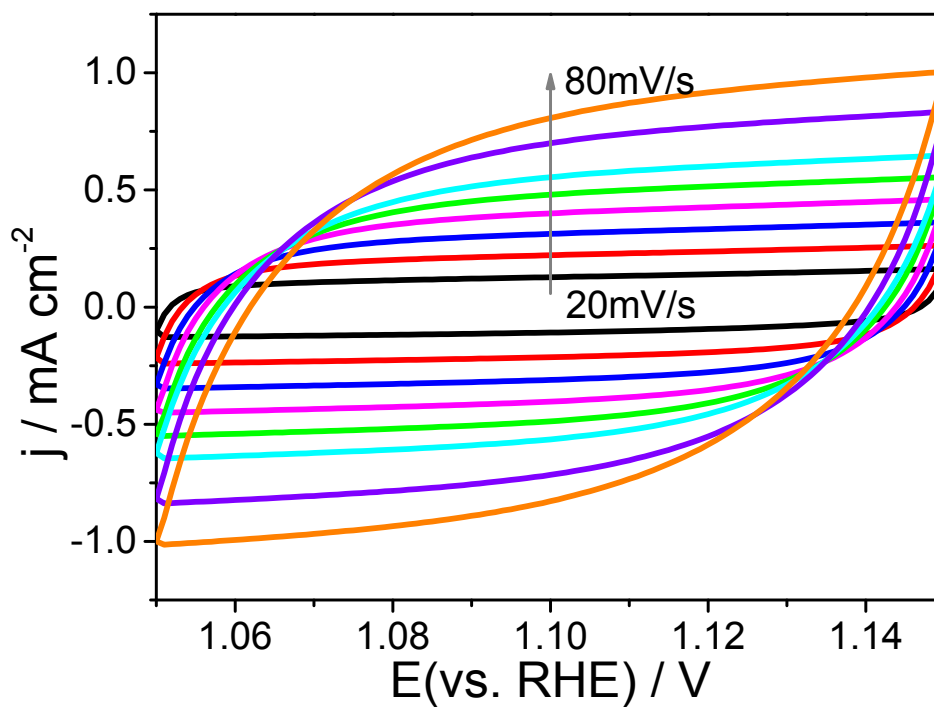

**Fig. 5S.** CV curves of Hemin@HN-900Zn tested at different scan rates.

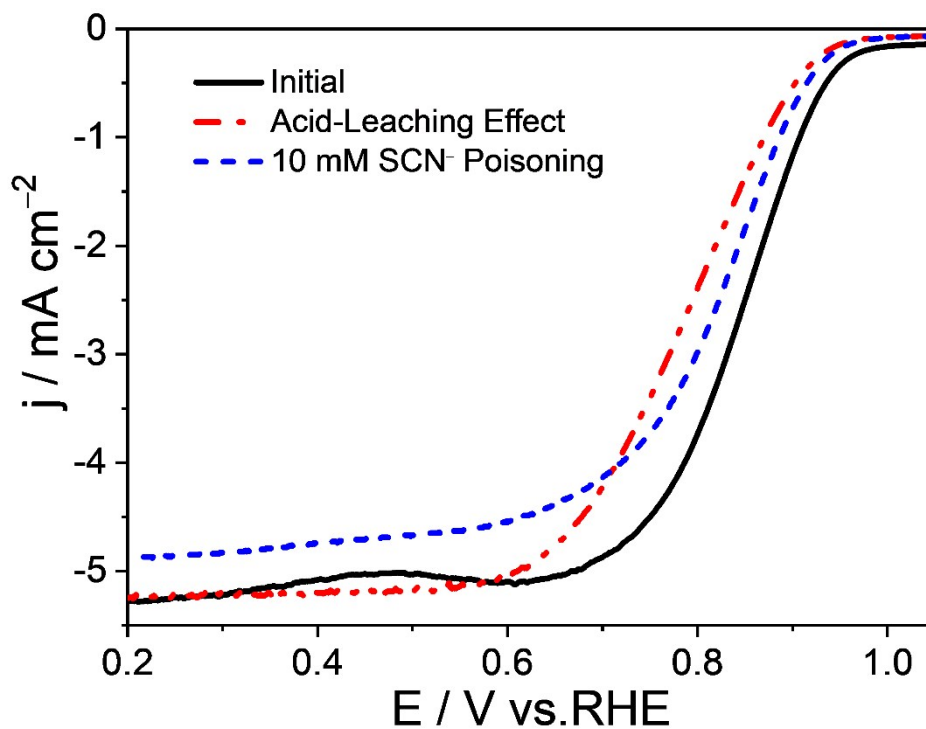

**Fig. 6S.** The LSV curves of Hemin@HN-800Zn catalyst in  $O_2$ -saturated KOH *versus*  $O_2$ -saturated KOH containing 10 mM  $SCN^-$ .

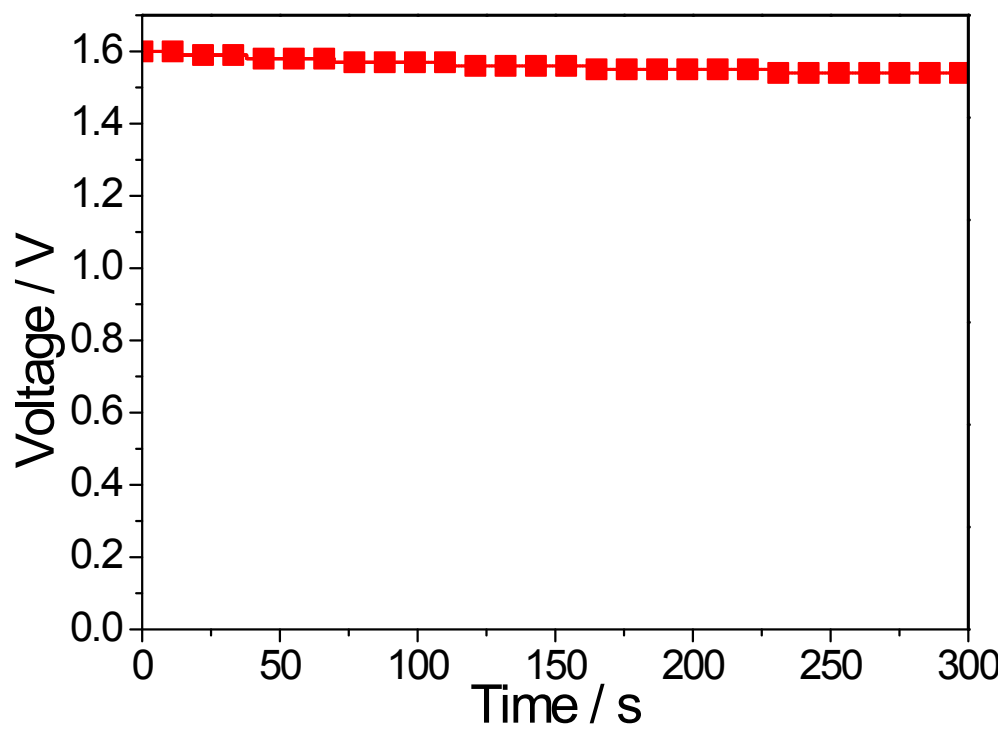

**Fig. 7S.** The open-circuit voltage of Zn-air battery using Hemin@HN-800Zn catalyst as a cathode.

**Table 1S.** Surface contents of C, N and O, fitted data of various nitrogen species, and corresponding ORR catalysis data in prepared carbon-based catalysts; Data derive from Fig. 4, Fig. 5 and Fig. 6.

| Sample         | C1s<br>at. % | N1s<br>at. % | O1s<br>at. % | Pyridinic N % | Fe-N<br>% | Graphitic N % | Pyridinic N <sup>+</sup> -O <sup>-</sup> % | E <sub>p</sub> / V | E <sub>ORR</sub> / V | E <sub>1/2</sub> / V | J @0.3V<br>mA cm <sup>-2</sup> | Average<br>H <sub>2</sub> O <sub>2</sub> % | Average<br><i>n</i> |
|----------------|--------------|--------------|--------------|---------------|-----------|---------------|--------------------------------------------|--------------------|----------------------|----------------------|--------------------------------|--------------------------------------------|---------------------|
| Hemin@HN-700Zn | 82.12        | 7.98         | 9.9          | 17.2          | 23.6      | 35.1          | 24.1                                       | 0.86               | 0.92                 | 0.78                 | 4.44                           | 6.20                                       | 3.88                |
| Hemin@HN-800Zn | 74.99        | 6.53         | 18.47        | 19.7          | 24.2      | 33.0          | 23.1                                       | 0.90               | 1.01                 | 0.85                 | 5.22                           | 3.67                                       | 3.93                |
| Hemin@HN-900Zn | 90.79        | 2.44         | 6.77         | 8.1           | 25.1      | 40.2          | 26.6                                       | 0.84               | 0.89                 | 0.76                 | 4.11                           | 6.34                                       | 3.87                |
| Pt-C catalyst  | ---          | ---          | ---          | ---           | ---       | ---           | ---                                        | 0.90               | 1.04                 | 0.85                 | 5.16                           | 4.4                                        | 3.91                |

**Table 2S.** Comparison of catalytic activity data of different catalysts.

| Sample                    | $E_{\text{ORR}} / \text{V vs. RHE}$ | $E_{1/2} / \text{V vs. RHE}$ | $j_d / \text{mA cm}^{-2}$ | Reference                                                   |
|---------------------------|-------------------------------------|------------------------------|---------------------------|-------------------------------------------------------------|
| Fe-NC                     | 0.96                                | 0.87                         | 5.82                      | Carbon 146 (2019) 671-679                                   |
| HNCSs                     | 0.92                                | 0.82                         | 5.48                      | Carbon 146 (2019) 248-256                                   |
| DAC-N800                  | 0.89                                | 0.79                         | 6.17                      | Carbon 146 (2019) 411-418                                   |
| Fe-NHPC-8                 | 0.99                                | 0.85                         | 5.40                      | Journal of Power Sources 448 (2020) 227443                  |
| FeNC-950                  | 0.94                                | 0.84                         | 5.85                      | Journal of Power Sources 450 (2020) 227659                  |
| Co-NCF                    | 0.91                                | 0.83                         | 5.74                      | Journal of Power Sources 450 (2020) 227577                  |
| Ni-GT-750-A               | 0.91                                | 0.77                         | 4.16                      | Journal of Colloid and Interface Science 571 (2020) 285-296 |
| Co-N <sub>x</sub> @CNF700 | 0.94                                | 0.81                         | 5.50                      | Nature communications, 2015, 6, 7343                        |
| CoFe/SN-C-25              | 0.91                                | 0.84                         | 6.96                      | Applied Catalysis B: Environmental 269 (2020) 118771        |
| NMC-1                     | 0.92                                | 0.82                         | 4.50                      | Nano Energy 62 (2019) 628-637                               |
| Hemin@HN-800Zn            | 1.01                                | 0.85                         | 5.22                      | This work                                                   |
